# Supplementary material for: Palatability and pharmacokinetics of flunixin when administered to sheep through feed
Source: PeerJ. 2016 Mar 14;4:e1800. doi: 10.7717/peerj.1800 (PMC4793306; doi:10.7717/peerj.1800)
Supplement: Supplemental Information 1 [file peerj-04-1800-s001.xlsx]

## Sheet: Concentration
Sheep	Time	Flunixin concentration	Feed consumed (g)
305	0	0	0
305	0.05	32.8	203
305	0.1	220.9	32
305	0.15	612.7	13
305	0.2	961.4	0
305	0.3	1297	29
305	0.45	1651	17
305	0.6	1818	0
305	2	2114	65.5
305	4	1789	138.5
305	6	1430	211
305	8	2389	50
305	12	965.5	41
305	24	273.4	0
305	36	28.2	0
305	48	0	0
466	0	0	0
466	0.05	0	357.5
466	0.1	118.2	1
466	0.15	668.5	0
466	0.2	1130	5
466	0.3	1351	24
466	0.45	1562	0
466	0.6	1614	3
466	2	1613	32
466	4	1575	166
466	6	1607	172
466	8	1509	39.5
466	12	1218	0
466	24	923.5	0
466	36	143.1	0
466	48	42.4	0
580	0	0	0
580	0.05	231.7	228.5
580	0.1	676.7	5
580	0.15	1048	13
580	0.2	1280	36
580	0.3	1570	18
580	0.45	1836	6
580	0.6	1888	45
580	2	1637	85
580	4	2007	127.5
580	6	2179	143.5
580	8	1982	92.5
580	12	1198	0
580	24	628.9	0
580	36	131.8	0
580	48	72.5	0
612	0	0	0
612	0.05	27.6	45
612	0.1	36.7	0
612	0.15	182.5	26
612	0.2	230.8	0
612	0.3	338.6	1
612	0.45	521	7
612	0.6	569.8	0
612	2	1738	211
612	4	1776	134
612	6	1887	103
612	8	1827	194
612	12	1804	79
612	24	755	0
612	36	102	0
612	48	42.9	0
621	0	0	0
621	0.05	411.9	98.5
621	0.1	665.1	35
621	0.15	993.9	31
621	0.2	1131	5
621	0.3	1463	50.5
621	0.45	1692	62.5
621	0.6	1767	1.5
621	2	2160	46.5
621	4	1976	180
621	6	1983	156
621	8	2118	116.5
621	12	1577	17
621	24	718.1	0
621	36	130.1	0
621	48	55.2	0
627	0	0	0
627	0.05	0	21.5
627	0.1	0	0
627	0.15	51.5	1
627	0.2	62.6	1
627	0.3	86.2	0
627	0.45	108.1	1
627	0.6	108.7	0
627	2	604.1	138
627	4	983.7	89
627	6	1132	71
627	8	1211	145
627	12	1329	332.5
627	24	904.7	0
627	36	106	0
627	48	29.4	0
648	0	0	0
648	0.05	0	235
648	0.1	69.3	71
648	0.15	203.3	48
648	0.2	367.5	0.5
648	0.3	658	26
648	0.45	1111	0.5
648	0.6	1413	0
648	2	1455	100
648	4	1247	220
648	6	1419	68
648	8	1419	31
648	12	1634	0
648	24	990.8	0
648	36	286.7	0
648	48	200.7	0
732	0	0	0
732	0.05	0	208.5
732	0.1	179.9	66
732	0.15	722.4	17
732	0.2	1198	1
732	0.3	1817	39
732	0.45	2299	11
732	0.6	2428	0
732	2	2485	53
732	4	2799	158
732	6	2591	208
732	8	1335	38.5
732	12	1312	0
732	24	345.8	0
732	36	32.1	0
732	48	0	0
